# Supplementary material for: Management of obstetric anal sphincter injury: a systematic review & national practice survey
Source: Springer Nature journal article supplement (doi:10.1186/1472-6963-2-9), 2002-05-13
Supplement: Additional file 1 [file 1472-6963-2-9-s1.doc]

**“What is known about the subject”**

**Anal incontinence is a ‘taboo’ symptom. There is good evidence that obstetric anal sphincter injury contributes to the ‘iceberg’ of morbidity, only the tip of which is now being seen by practitioners. Research suggests that significant proportions of these injuries were not recognised at the time of birth. Even if the injury is recognised the suggested options in relation to repair and subsequent management are diverse and not evidence based. Current practice appears to be opinion led and new developments are largely influenced by parallel experiences in colorectal surgery.**

**“What this paper adds”**

**This review and national survey highlight wide variations in knowledge and in practice. The short-comings in training are clearly demonstrated. These factors are all likely to influence recognition rates. Undetected injuries may contribute substantially to the high incidence of anal incontinence after childbirth. The survey was linked to a systematic review of the literature, which demonstrated a lack of evidence from randomised trials for any of the numerous interventions relating to the management of detected obstetric anal sphincter injury. The review suggests the wider adoption of agreed definitions and points towards standards of care that are being introduced in national guidelines. The importance of specific training and further research in this area becomes self-evident.**
